# Supplementary material for: Unraveling Li-ion transport mechanisms in high-entropy anion-disordered argyrodites via machine-learned interatomic potentials
Source: Royal Society of Chemistry journal article supplement (doi:10.1039/d5ta02205c), 2025-01-01
Supplement: d5ta02205c1.pdf [file d5ta02205c1.pdf]

## Supporting Information

### Unraveling Li-Ion Transport Mechanisms in High-Entropy Anion-Disordered Argyrodites via Machine-Learned Interatomic Potentials

Myeongcho Jang,<sup>a,b,†</sup> Kanguk Park,<sup>a,†</sup> Hun-Gi Jung,<sup>a,c,d</sup> Kyung Yoon Chung,<sup>a,c</sup> Joon Hyung Shim,<sup>b,\*</sup> Ohmin Kwon,<sup>a,e,\*</sup> Seungho Yu<sup>a,c,\*</sup>

<sup>a</sup>Energy Storage Research Center, Korea Institute of Science and Technology, 5, Hwarang-ro 14-gil, Seongbuk-gu, Seoul 02792, Republic of Korea

<sup>b</sup>School of Mechanical Engineering, Korea University, 145 Anam-ro, Seongbuk-gu, Seoul 02841, South Korea

<sup>c</sup>Division of Energy & Environment Technology, KIST School, Korea University of Science and Technology, Seoul 02792, Republic of Korea

<sup>d</sup>Department of Energy Science and KIST-SKKU Carbon-Neutral Research Center, Sungkyunkwan University, Suwon 16419, Republic of Korea

<sup>e</sup>LiB Materials Research Group, Research Institute of Industrial Technology and Science (RIST), POSCO global R&D center, Songdogwahak-ro 100, Yeonsu-gu, Incheon, 21985, Republic of Korea

<sup>†</sup>M. J. and K. P. contributed equally to this work.

\*Corresponding Authors

Joon Hyung Shim, E-mail: [shimm@korea.ac.kr](mailto:shimm@korea.ac.kr)

Ohmin Kwon, E-mail: [omkwon0823@posco-inc.com](mailto:omkwon0823@posco-inc.com)

Seungho Yu, E-mail: [shyu@kist.re.kr](mailto:shyu@kist.re.kr)

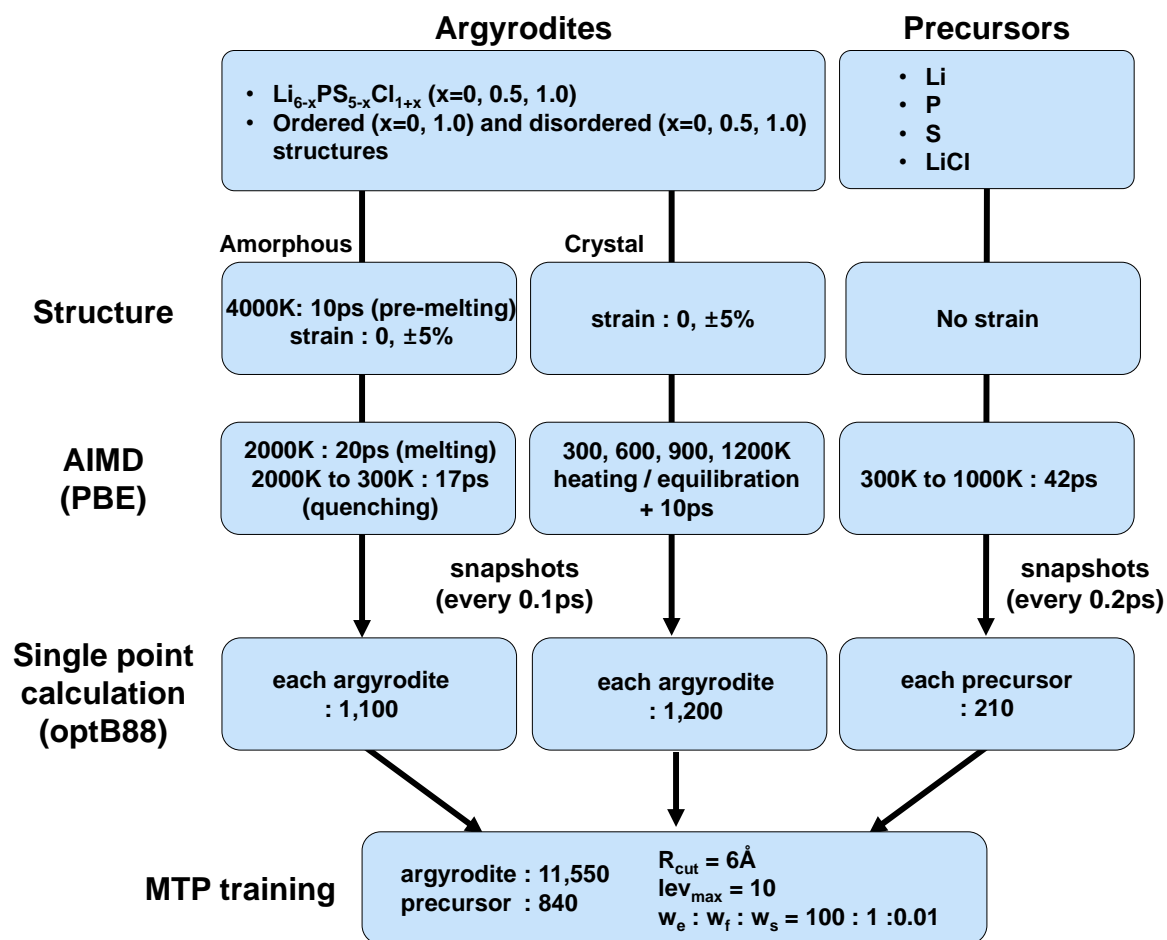

**Figure S1.** Flowchart of the methods used to develop machine-learned interatomic potentials.

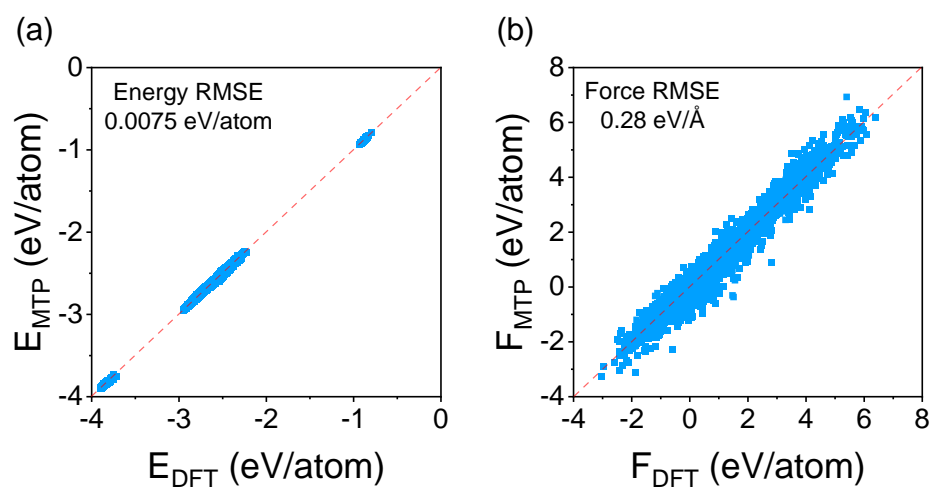

**Figure S2.** (a) Energy and (b) force calculated using MLIP and DFT for the Li-P-S-Cl system, including RMSE values.

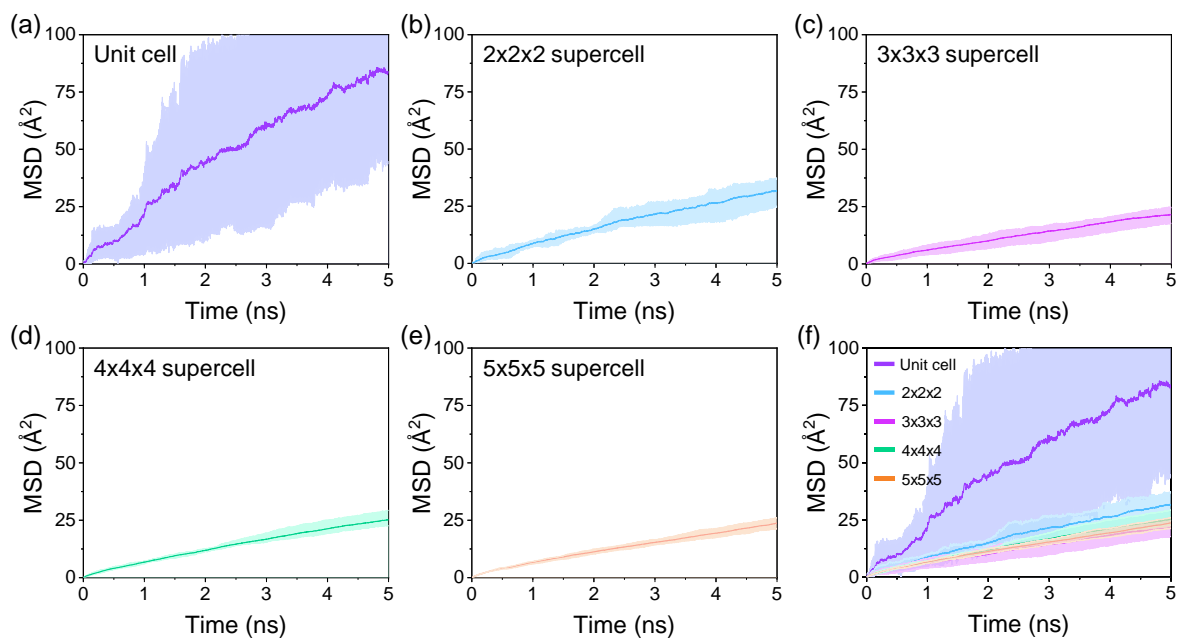

**Figure S3.** Li-ion MSD values for  $\text{Li}_6\text{PS}_5\text{Cl}$  at 300 K using (a) a unit cell, (b) a  $2 \times 2 \times 2$  supercell, (c) a  $3 \times 3 \times 3$  supercell, (d) a  $4 \times 4 \times 4$  supercell, (e) a  $5 \times 5 \times 5$  supercell, and (f) a comparison plot for (a–e). The MSD values were averaged over five independent MD simulations, and the error range in plots (a–e) represents the maximum and minimum values observed during these five MD simulations.

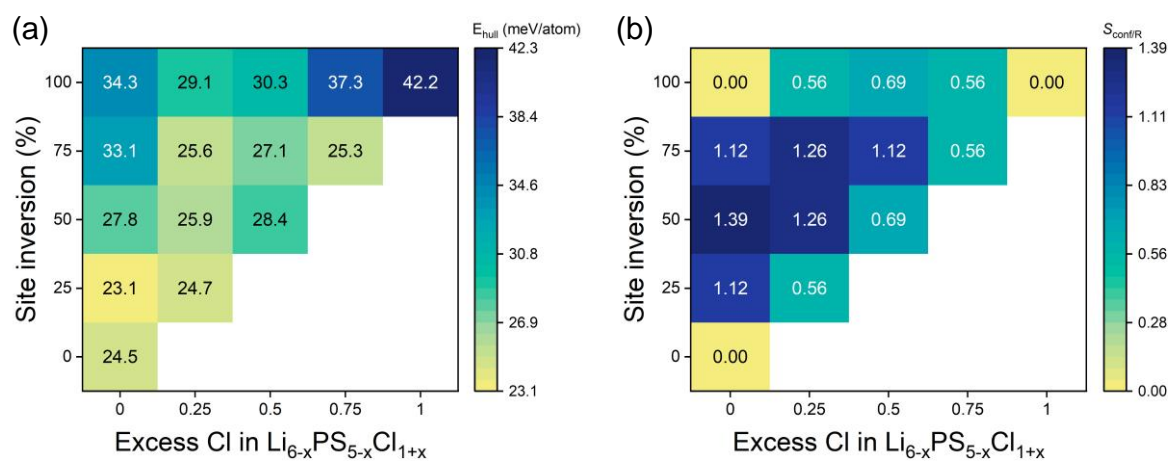

**Figure S4.** (a) Energy above the hull for  $\text{Li}_{6-x}\text{PS}_{5-x}\text{Cl}_{1+x}$  phases with varying degrees of S/Cl site inversion, and (b) their corresponding configurational entropies.

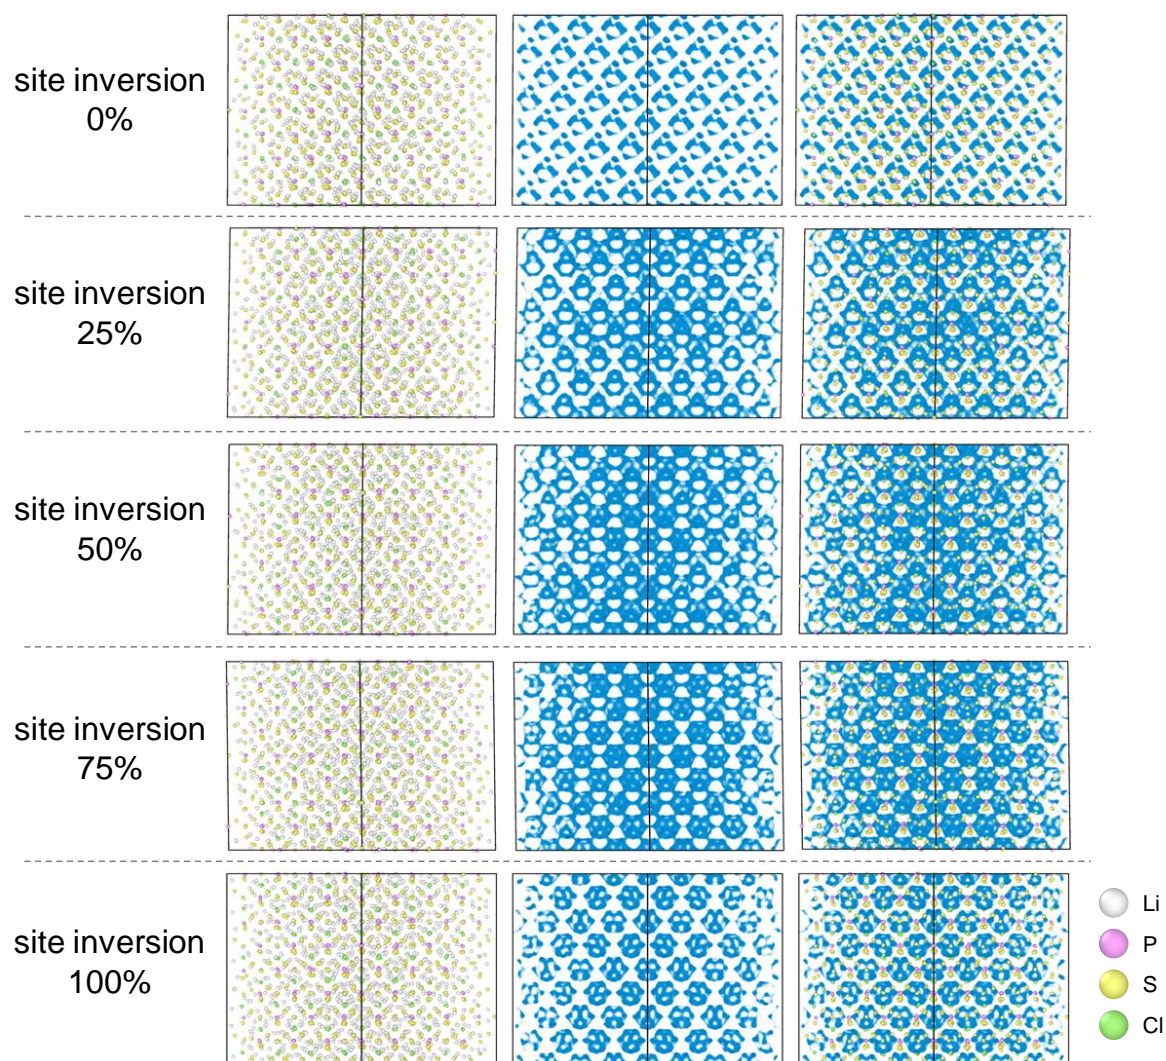

**Figure S5.** Isosurfaces of the Li-ion probability densities (light blue) for  $\text{Li}_6\text{PS}_5\text{Cl}$  with site disorder between the 4a and 4d sites, shown at different degrees of S/Cl site inversion of 0%, 25%, 50%, 75%, and 100%. The left column shows the atomic structures, including Li (white), P (pink), S (yellow), and Cl (green) atoms; the center displays Li-ion trajectories; and the right presents both Li-ion trajectories and atomic structures.

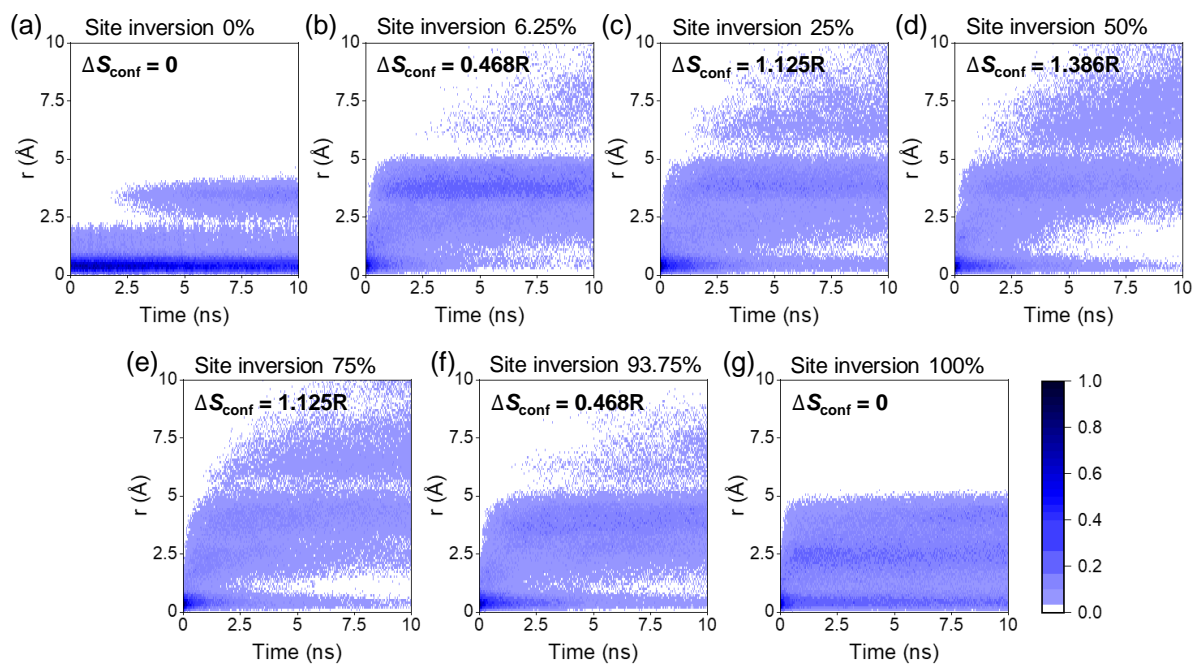

**Figure S6.** The self-part of the van Hove correlation function in  $\text{Li}_6\text{PS}_5\text{Cl}$  as a function of the degree of S/Cl site inversion, ranging from 0% to 100%, based on a 10 ns MD simulation at 300 K, shown for: (a) 0%, (b) 6.25%, (c) 25%, (d) 50%, (e) 75%, (f) 93.75%, and (g) 100%

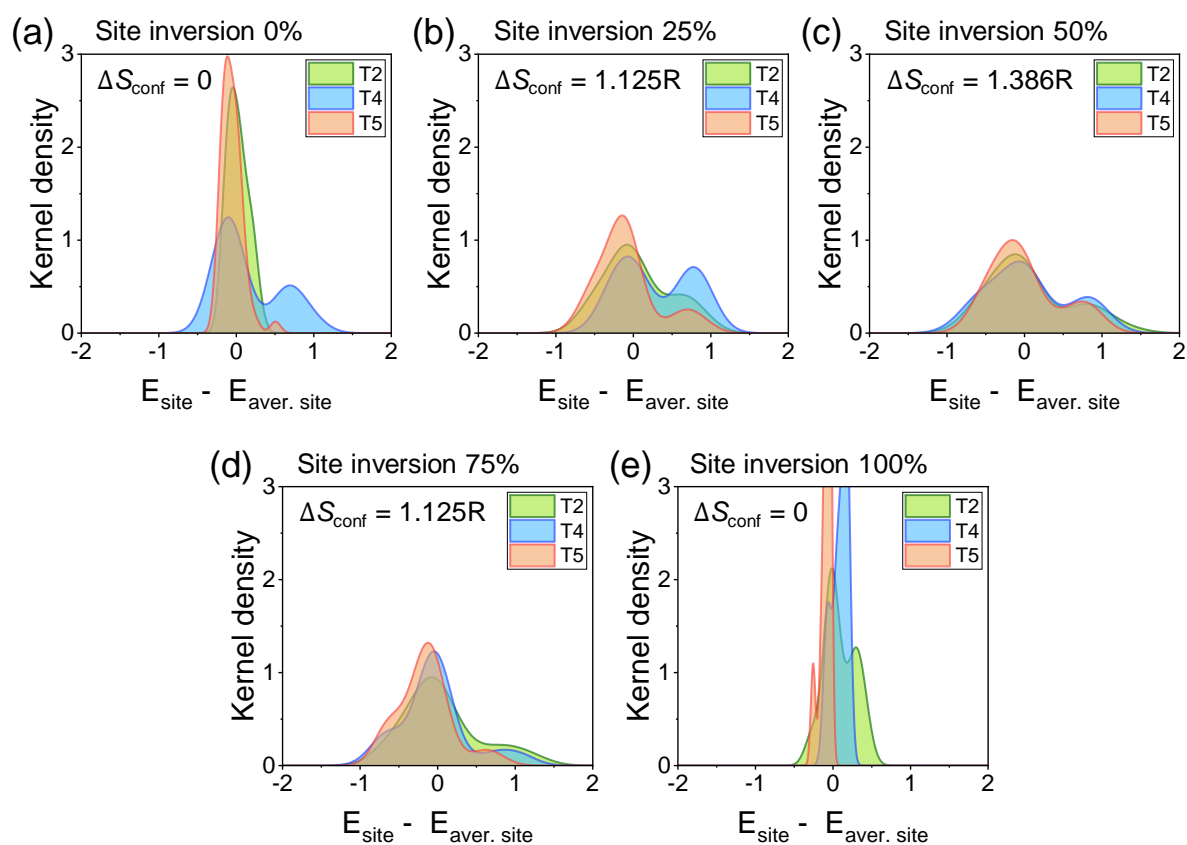

**Figure S7.** Site energy distributions for Li at the T2, T4, and T5 sites at different degrees of S/Cl site inversion of (a) 0%, (b) 25%, (c) 50%, (d) 75% and (e) 100%.



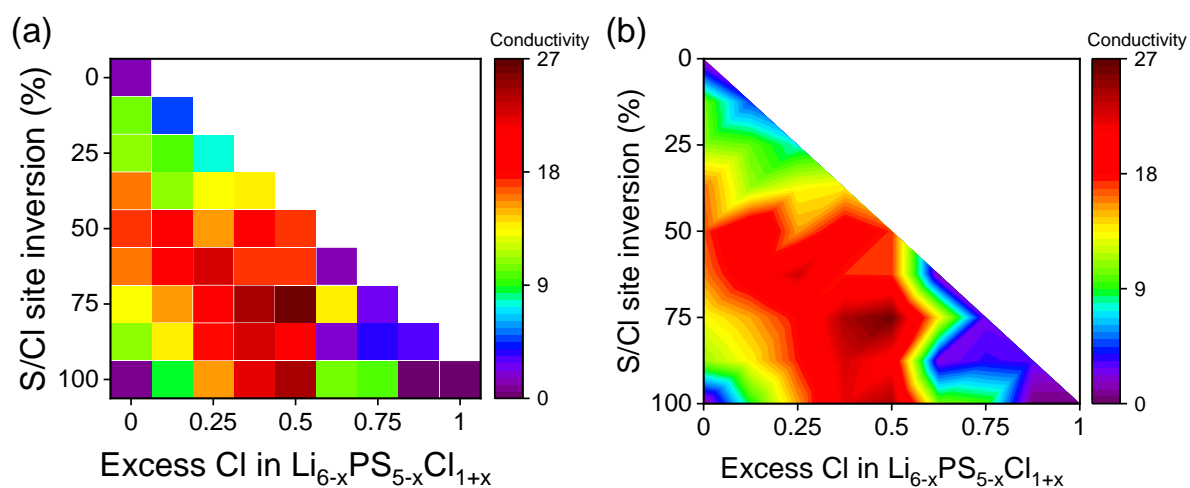

**Figure S8.** Ionic conductivity of Cl-rich argyrodites  $\text{Li}_{6-x}\text{PS}_{5-x}\text{Cl}_{1+x}$  ( $0 \leq x \leq 1$ ) as a function of chlorine content, with varying degrees of S/Cl site inversion: (a) heat map and (b) contour map.

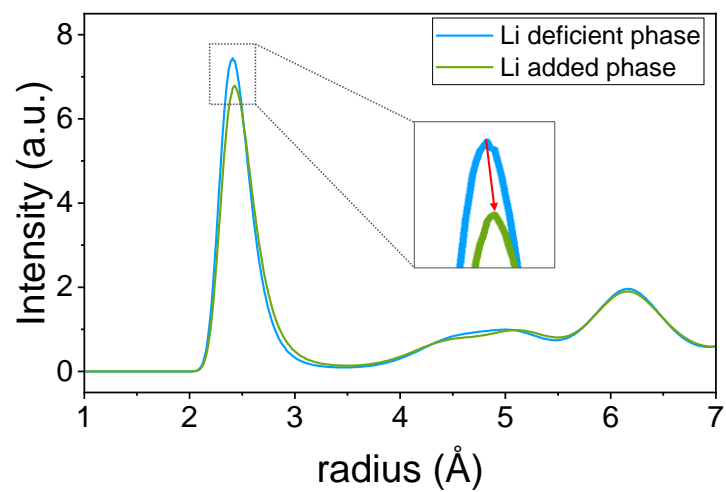

**Figure S9.** The radial distribution function (RDF) plot for the bonds between all Li and Cl in the 4d sites for the Li-deficient phase,  $\text{Li}_{5.375}\text{PS}_{4.375}\text{Cl}_{1.625}$ , and the Li-added phase,  $\text{Li}_6\text{PS}_{4.375}\text{Cl}_{1.625}$ .
